# Supplementary material for: Uncertainty, Risk, and the Efficiencies of the Principal and the Agent: A Chance Constrained Data Envelopment Analysis Approach
Source: Hindawi journal article supplement (doi:10.1155/2018/8373614), 2018-10-22
Supplement: f1 [file 8373614.f1.docx]

**Appendices**

**A. Reformulation of DEA stochastic models**

The constraints of model (2), including the stochastic process, can be rewritten as follows:

(A.1)

Eq. (A.1) is equivalent to

(A.2)

where is the expected value of and

(A.3)

Here, indicates the variance-covariance matrix of the th DMU in which the symbol “D” stands for a variance and the symbol “cov” refers to a covariance operator.

follows the standard normal distribution with zero mean and unit variance. Then the invertibility of Eq. (A.3) is executed as follows:

(A.4)

Here, stands for a cumulative distribution function of the normal distribution and indicates its inverse function.

Model (2) is obtained by replacing Eq. (A.1) by (A.4) its resulting formulation becomes

(A.5)

This research assumes that a stochastic variable () is expressed by , where is the expected value of and is its standard deviation and is a single random variable which follows a standard normal distribution . It is also assumed that . Under such an assumption, becomes , then model (A.5) can be transformed as:

(A.6)

Similar to model (2), model (3) can be transformed as

(A.7)

where is the expected value of and is its standard deviation.

Model (5) can be transformed as

  (A.8)

where is the TMT’s risk criterion.

Model (7) can be transformed as

(A.9)

Here, is a parameter and its range can be estimated by the following: from the constraint , we obtain . Since where and are the efficiencies of the TMT in which the TMT is dominated or dominates, . See the following model for the solution of .

Model (8) can be transformed as

(A.10)

We can obtain the optimum efficiency of the TMT dominated by the principal based on model (A.10), i.e., .

Model (9) can be transformed as

(A.11)

**B. Sensitivity analysis of the standard deviations of outcomes and payments**

**Table B.1**

Stochastic efficiencies under different standard deviations.

| DMUs | Model (8) | | | | | | | |
| --- | --- | --- | --- | --- | --- | --- | --- | --- |
| -5% | | -1% | | 1% | | 5% | |
|  |  |  |  |  |  |  |  |
| SZZY | 0.8648 | 0.7618 | 0.8598 | 0.7542 | 0.8573 | 0.7505 | 0.8523 | 0.7432 |
| BAHRE | 0.5562 | 0.2037 | 0.5454 | 0.1986 | 0.5401 | 0.1961 | 0.5299 | 0.1913 |
| OW | 0.4501 | 0.4021 | 0.4468 | 0.3919 | 0.4452 | 0.3870 | 0.4420 | 0.3776 |
| RONG AN | 0.7338 | 0.1414 | 0.7284 | 0.1378 | 0.7258 | 0.1361 | 0.7207 | 0.1328 |
| ZHONG TIAN | 0.1945 | 0.0685 | 0.1931 | 0.0668 | 0.1924 | 0.0660 | 0.1911 | 0.0644 |
| JINKE | 0.1555 | 0.2979 | 0.1532 | 0.2905 | 0.1519 | 0.2869 | 0.1496 | 0.2800 |
| TAI HE | 0.5948 | 0.1325 | 0.5905 | 0.1291 | 0.5884 | 0.1275 | 0.5843 | 0.1244 |
| GUANG YU | 0.5828 | 0.2187 | 0.5785 | 0.2153 | 0.5764 | 0.2137 | 0.5723 | 0.2105 |
| SHCH | 0.6445 | 0.2473 | 0.6435 | 0.2411 | 0.6430 | 0.2381 | 0.6421 | 0.2322 |
| CHJK | 0.0243 | 0.7792 | 0.0238 | 0.7720 | 0.0236 | 0.7685 | 0.0231 | 0.7615 |
| TJFDCH | 0.6436 | 0.1270 | 0.6384 | 0.1238 | 0.6359 | 0.1223 | 0.6309 | 0.1193 |
| TIAN HONG | 0.8571 | 0.3826 | 0.8558 | 0.3729 | 0.8551 | 0.3682 | 0.8539 | 0.3592 |
| WAN YE | 0.2881 | 0.3451 | 0.2858 | 0.3415 | 0.2847 | 0.3397 | 0.2826 | 0.3362 |
| DMCH | 0.3378 | 0.1861 | 0.3341 | 0.1814 | 0.3324 | 0.1791 | 0.3292 | 0.1747 |
| SHI MAO | 0.9409 | 0.6381 | 0.9394 | 0.6285 | 0.9387 | 0.6238 | 0.9373 | 0.6146 |
| BEI CHEN | 0.4911 | 0.2650 | 0.4904 | 0.2582 | 0.4900 | 0.2550 | 0.4893 | 0.2488 |

**Table B.2**

Stochastic efficiencies under different standard deviations.

| DMUs | Model (9) | | | | | | | |
| --- | --- | --- | --- | --- | --- | --- | --- | --- |
| -5% | | -1% | | 1% | | 5% | |
|  |  |  |  |  |  |  |  |
| SZZY | 0.4088 | 0.7618 | 0.4057 | 0.7542 | 0.4041 | 0.7505 | 0.4041 | 0.7432 |
| BAHRE | 0.3339 | 0.2037 | 0.3293 | 0.1986 | 0.3271 | 0.1961 | 0.3271 | 0.1913 |
| OW | 0.2091 | 0.4021 | 0.2055 | 0.3919 | 0.2038 | 0.3870 | 0.2038 | 0.3776 |
| RONG AN | 0.3150 | 0.1414 | 0.3102 | 0.1378 | 0.3078 | 0.1361 | 0.3078 | 0.1328 |
| ZHONG TIAN | 0.1096 | 0.0685 | 0.1061 | 0.0668 | 0.1045 | 0.0660 | 0.1045 | 0.0644 |
| JINKE | 0.1022 | 0.2979 | 0.1007 | 0.2905 | 0.1000 | 0.2869 | 0.1000 | 0.2800 |
| TAI HE | 0.2721 | 0.1325 | 0.2650 | 0.1291 | 0.2615 | 0.1275 | 0.2615 | 0.1244 |
| GUANG YU | 0.2581 | 0.2187 | 0.2535 | 0.2153 | 0.2512 | 0.2137 | 0.2512 | 0.2105 |
| SHCH | 0.2057 | 0.2473 | 0.2025 | 0.2411 | 0.2009 | 0.2381 | 0.2009 | 0.2322 |
| CHJK | 0.0211 | 0.7792 | 0.0208 | 0.7720 | 0.0207 | 0.7685 | 0.0207 | 0.7615 |
| TJFDCH | 0.2202 | 0.1270 | 0.2179 | 0.1238 | 0.2168 | 0.1223 | 0.2168 | 0.1193 |
| TIAN HONG | 0.2670 | 0.3826 | 0.2620 | 0.3729 | 0.2596 | 0.3682 | 0.2596 | 0.3592 |
| WAN YE | 0.1378 | 0.3451 | 0.1362 | 0.3415 | 0.1355 | 0.3397 | 0.1355 | 0.3362 |
| DMCH | 0.2001 | 0.1861 | 0.1973 | 0.1814 | 0.1960 | 0.1791 | 0.1960 | 0.1747 |
| SHI MAO | 0.2731 | 0.6381 | 0.2703 | 0.6285 | 0.2689 | 0.6238 | 0.2689 | 0.6146 |
| BEI CHEN | 0.1587 | 0.2650 | 0.1560 | 0.2582 | 0.1547 | 0.2550 | 0.1547 | 0.2488 |

**Table B.3**

The effort levels under different standard deviations.

| DMUs | Model (8) | | | |
| --- | --- | --- | --- | --- |
| -5% | -1% | 1% | 5% |
| SZZY | -2.7853 | -2.8750 | -2.9731 | -2.3901 |
| BAHRE | 1.0000 | 1.0000 | 1.0000 | 1.0000 |
| OW | 1.0000 | 1.0000 | 1.0000 | 1.0000 |
| RONG AN | -4.0684 | -4.1219 | -4.1477 | -4.1975 |
| ZHONG TIAN | -4.2732 | -4.3318 | -4.3600 | -4.4145 |
| JINKE | -4.1772 | -4.2334 | -4.2605 | -4.3127 |
| TAI HE | 1.0000 | 1.0000 | 1.0000 | 1.0000 |
| GUANG YU | -7.9101 | -8.0952 | -8.1856 | -8.3623 |
| SHCH | 1.0000 | 1.0000 | 1.0000 | 1.0000 |
| CHJK | -776.8929 | -743.1076 | -762.3932 | -1035.8478 |
| TJFDCH | 1.0000 | 1.0000 | 1.0000 | 1.0000 |
| TIAN HONG | -2.4772 | -2.4870 | -2.4915 | -2.5004 |
| WAN YE | -0.1427 | -0.1680 | -0.1805 | -0.2050 |
| DMCH | 1.0000 | 1.0000 | 1.0000 | 1.0000 |
| SHI MAO | -20788.1 | -19554.8 | -17068.5 | -15373.6 |
| BEI CHEN | 1.0000 | 1.0000 | 1.0000 | 1.0000 |

**Table B.4**

The effort levels under different standard deviations.

| DMUs | Model (9) | | | |
| --- | --- | --- | --- | --- |
| -5% | -1% | 1% | 5% |
| SZZY | -2.5830 | -2.5822 | -2.5819 | -2.5813 |
| BAHRE | 1.0000 | 1.0000 | 1.0000 | 1.0000 |
| OW | 1.0000 | 1.0000 | 1.0000 | 1.0000 |
| RONG AN | -4.0684 | -4.1219 | -4.1477 | -4.1975 |
| ZHONG TIAN | -4.2732 | -4.3318 | -4.3600 | -4.4145 |
| JINKE | -4.1772 | -4.2334 | -4.2605 | -4.3127 |
| TAI HE | 1.0000 | 1.0000 | 1.0000 | 1.0000 |
| GUANG YU | -7.9101 | -8.0952 | -8.1856 | -8.3623 |
| SHCH | 1.0000 | 1.0000 | 1.0000 | 1.0000 |
| CHJK | -169.52 | -168.14 | -167.61 | -166.63 |
| TJFDCH | 1.0000 | 1.0000 | 1.0000 | 1.0000 |
| TIAN HONG | -1.0054 | -1.0471 | -1.0676 | -1.1083 |
| WAN YE | -0.1427 | -0.1680 | -0.1805 | -0.2050 |
| DMCH | 1.0000 | 1.0000 | 1.0000 | 1.0000 |
| SHI MAO | -716.13 | -730.99 | -737.08 | -747.22 |
| BEI CHEN | 1.0000 | 1.0000 | 1.0000 | 1.0000 |
